# Supplementary material
Source: PubMed Central journal article supplement (PMC7042943)
Supplement: jamaotolaryngolheadnecksurg-146-347-s001.pdf [file jamaotolaryngolheadnecksurg-146-347-s001.pdf]

## Supplementary Online Content

Vila PM, Jeanpierre LM, Rizzi CJ, Yaeger LH, Chi JJ. Comparison of autologous vs homologous costal cartilage in dorsal augmentation rhinoplasty: a systematic review and meta-analysis. *JAMA Otolaryngol Head Neck Surg*. Published online February 20, 2020. doi:10.1001/jamaoto.2019.4787

**eFigure 1.** Meta-analysis of Studies Examining Rates of Contour Irregularity Between Cartilage Graft Types

**eFigure 2.** Meta-analysis of Studies Examining Infection Rates Between Cartilage Graft Types

**eTable.** Risk of Bias Assessment Among Included Studies

This supplementary material has been provided by the authors to give readers additional information about their work.

**eFigure 1.** Meta-analysis of studies examining rates of contour irregularity between cartilage graft types

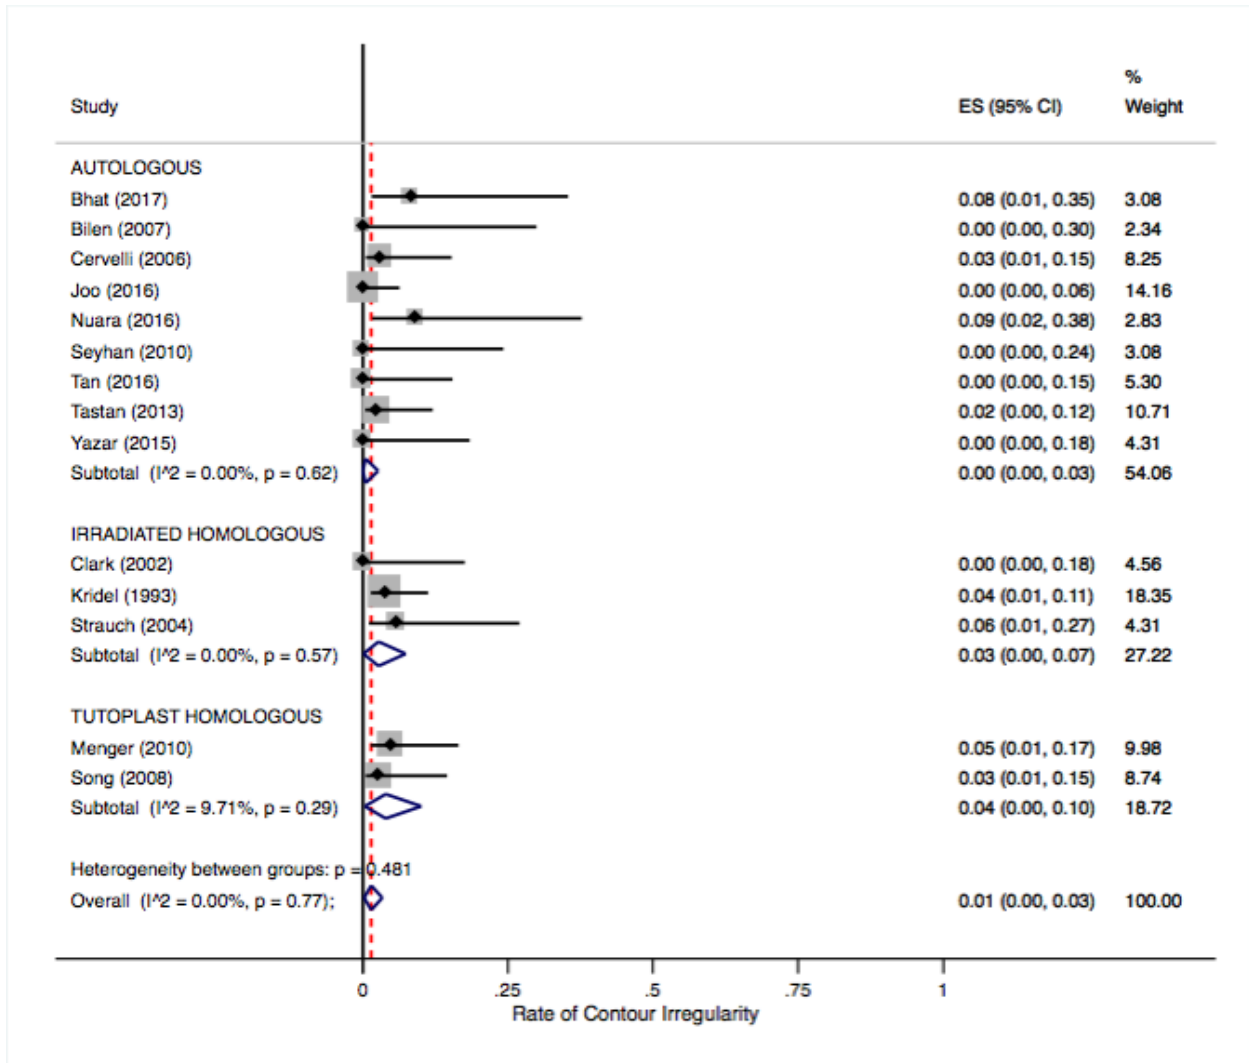

**eFigure 2.** Meta-analysis of studies examining infection rates between cartilage graft types

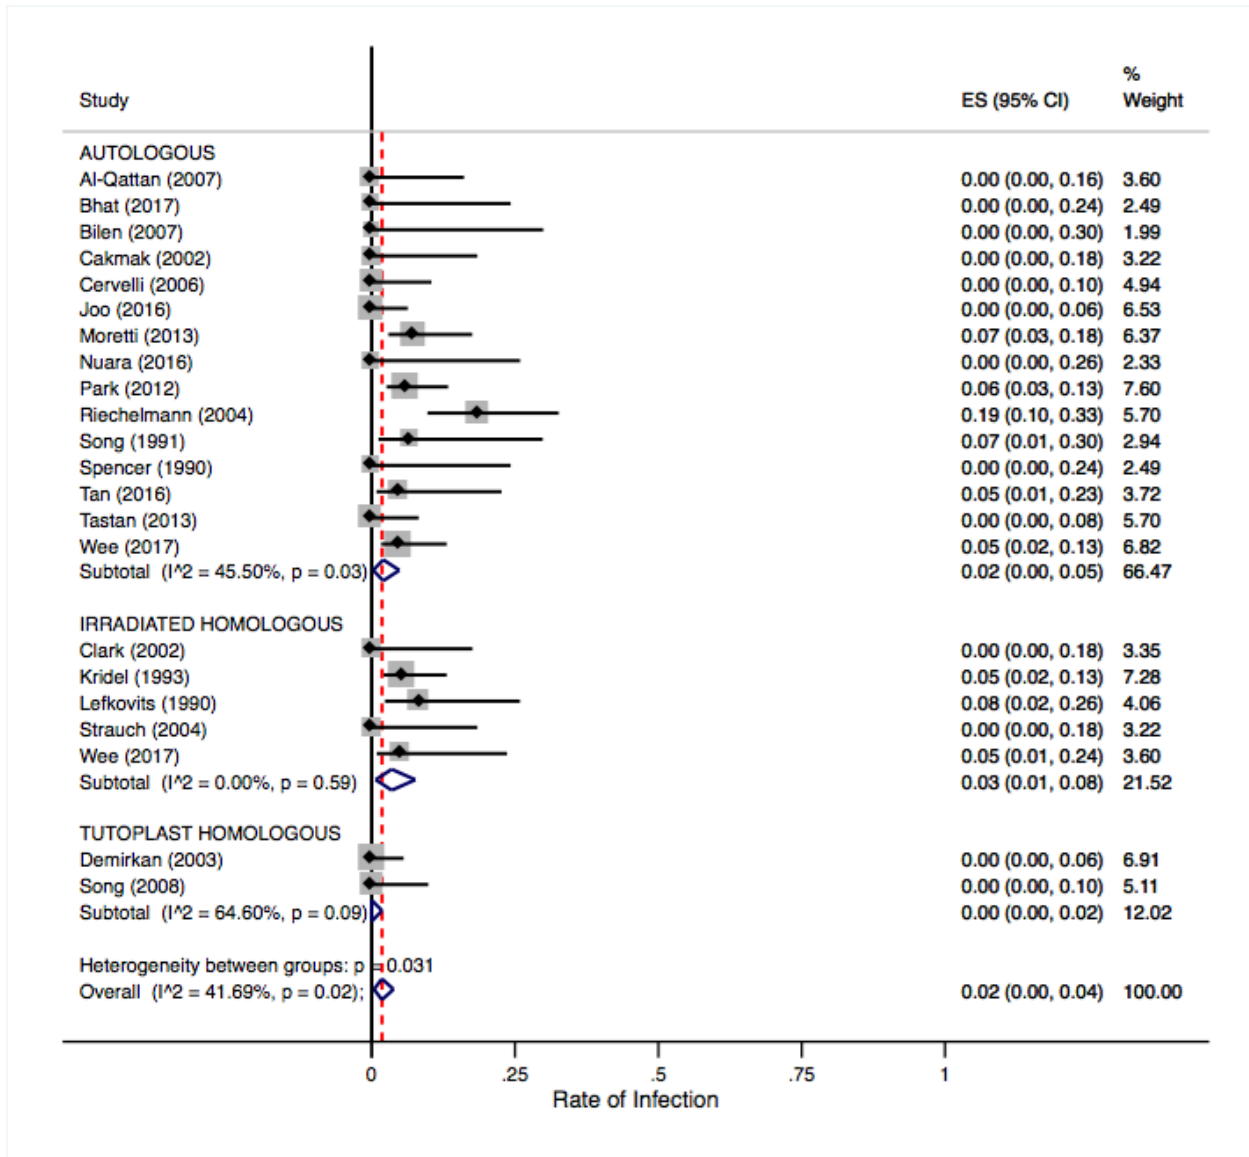

**eTable.** Risk of bias assessment among included studies

| Reference        | Overall Risk of Bias | Random sequence generation | Allocation concealment | Blinding of participants and personnel | Incomplete outcome data | Selective reporting | Other sources of bias |
|------------------|----------------------|----------------------------|------------------------|----------------------------------------|-------------------------|---------------------|-----------------------|
| Al-Qattan 2007   | High                 | N/A                        | N/A                    | High                                   | Low                     | Unclear             | Unclear               |
| Balaji 2013      | High                 | N/A                        | N/A                    | High                                   | Unclear                 | Unclear             | Unclear               |
| Bhat 2017        | High                 | N/A                        | N/A                    | High                                   | Unclear                 | Unclear             | Unclear               |
| Bilen 2007       | High                 | N/A                        | N/A                    | High                                   | Unclear                 | Unclear             | Unclear               |
| Cakmak 2002      | High                 | N/A                        | N/A                    | High                                   | Unclear                 | Unclear             | Unclear               |
| Cervelli 2006    | High                 | N/A                        | N/A                    | High                                   | Unclear                 | Unclear             | Unclear               |
| Hussein 2015     | Unclear              | N/A                        | N/A                    | Unclear                                | Unclear                 | Unclear             | Unclear               |
| Joo 2016         | Unclear              | N/A                        | N/A                    | Low                                    | Low                     | Unclear             | Unclear               |
| Karaaltin 2012   | High                 | N/A                        | N/A                    | High                                   | Unclear                 | Unclear             | Unclear               |
| Moretti 2013     | High                 | N/A                        | N/A                    | High                                   | Unclear                 | Unclear             | Unclear               |
| Nuara 2016       | High                 | N/A                        | N/A                    | High                                   | Unclear                 | Unclear             | Unclear               |
| Park 2012        | Unclear              | N/A                        | N/A                    | Low                                    | Low                     | Unclear             | Unclear               |
| Riechelmann 2004 | High                 | N/A                        | N/A                    | High                                   | Unclear                 | Unclear             | Unclear               |
| Seyhan 2010      | Unclear              | N/A                        | N/A                    | Unclear                                | Unclear                 | Unclear             | Unclear               |
| Song 1991        | High                 | N/A                        | N/A                    | High                                   | Unclear                 | Unclear             | Unclear               |
| Spencer 1990     | High                 | N/A                        | N/A                    | High                                   | Unclear                 | Unclear             | Unclear               |
| Tan 2016         | High                 | N/A                        | N/A                    | High                                   | Unclear                 | Unclear             | Unclear               |
| Tastan 2013      | High                 | N/A                        | N/A                    | High                                   | Unclear                 | Unclear             | Unclear               |
| Wee 2017         | Unclear              | N/A                        | N/A                    | Low                                    | Low                     | Unclear             | Unclear               |
| Yazar 2015       | High                 | N/A                        | N/A                    | High                                   | Unclear                 | Unclear             | Unclear               |
| Yilmaz 2007      | High                 | N/A                        | N/A                    | High                                   | Unclear                 | Unclear             | Unclear               |
| Clark 2002       | High                 | N/A                        | N/A                    | High                                   | Low                     | Unclear             | Unclear               |
| Kridel 1993      | High                 | N/A                        | N/A                    | High                                   | Low                     | Unclear             | Unclear               |
| Lefkovits 1990   | High                 | N/A                        | N/A                    | High                                   | Unclear                 | Unclear             | Unclear               |
| Strauch 2004     | High                 | N/A                        | N/A                    | High                                   | Unclear                 | Unclear             | Unclear               |
| Demirkan 2003    | High                 | N/A                        | N/A                    | High                                   | Unclear                 | Unclear             | Unclear               |
| Menger 2010      | High                 | N/A                        | N/A                    | High                                   | Low                     | Unclear             | Unclear               |
| Song 2008        | High                 | N/A                        | N/A                    | High                                   | Unclear                 | Unclear             | Unclear               |
